# Supplementary material for: Short-Term Exenatide Treatment Leads to Significant Weight Loss in a Subset of Obese Women Without Diabetes
Source: Oxford University Press journal article supplement (doi:10.2337/dc11-0931), 2011-11-01

SUPPLEMENTARY DATA

**Supplementary Table 1.** Change in nausea during exenatide and placebo treatment periods.

| <b>Outcome</b>          | <b>Treatment</b> | <b>Estimated <math>\Delta</math><br/>During Treatment<br/>Period (0-16 wks)</b> | <b>Lower limit (95%<br/>confidence)</b> | <b>Upper limit (95%<br/>confidence)</b> | <b>p-value</b> |
|-------------------------|------------------|---------------------------------------------------------------------------------|-----------------------------------------|-----------------------------------------|----------------|
| $\Delta$ Nausea wk 0-2  | Exenatide        | 0.89                                                                            | 0.32                                    | 1.46                                    | <b>0.031</b>   |
|                         | Placebo          | 0                                                                               | -0.56                                   | 0.57                                    |                |
| $\Delta$ Nausea wk 0-4  | Exenatide        | 1.23                                                                            | 0.63                                    | 1.84                                    | <b>0.002</b>   |
|                         | Placebo          | -0.03                                                                           | -0.61                                   | 0.55                                    |                |
| $\Delta$ Nausea wk 0-8  | Exenatide        | 0.66                                                                            | 0.22                                    | 1.1                                     | <b>0.007</b>   |
|                         | Placebo          | -0.12                                                                           | -0.53                                   | 0.3                                     |                |
| $\Delta$ Nausea wk 0-12 | Exenatide        | 0.57                                                                            | -0.04                                   | 1.18                                    | <b>0.074</b>   |
|                         | Placebo          | -0.13                                                                           | -0.7                                    | 0.45                                    |                |
| $\Delta$ Nausea wk 0-16 | Exenatide        | 0.47                                                                            | -0.02                                   | 0.96                                    | 0.186          |
|                         | Placebo          | 0                                                                               | -0.46                                   | 0.47                                    |                |

Nausea was assessed using a 10cm horizontal visual analog scale (VAS). Note that 0-2 weeks reflects initial dose of exenatide or placebo (5  $\mu$ g twice daily) while all other intervals reflect 10  $\mu$ g twice daily. A negative value indicates a decrease in nausea. All parameters were reported in the morning in the fasted state. Estimated deltas are reported from a least squared means model to account for any period (order) effect.

Supplementary Figure 1. Study Scheme

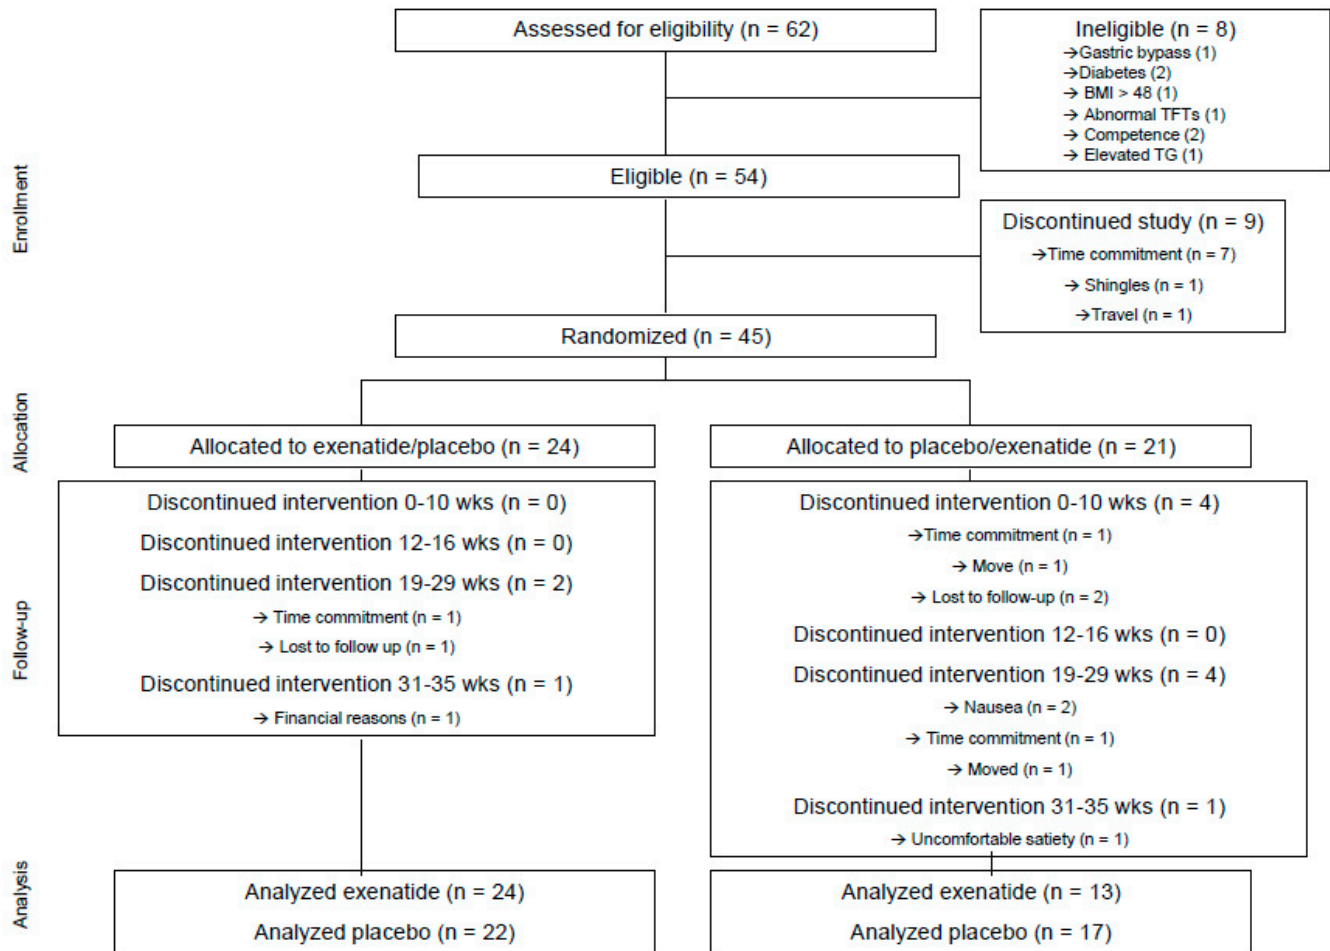

Supplement: dc110931supplementarydata.pdf [file dc110931supplementarydata.pdf]
